# Supplementary material for: Effect of Adjunctive Simvastatin on Depressive Symptoms Among Adults With Treatment-Resistant Depression: A Randomized Clinical Trial
Source: PubMed Central journal article supplement (PMC9941891; doi:10.1001/jamanetworkopen.2023.0147), 2023-02-20
Supplement: jamanetwopen-e230147-s003.pdf [file jamanetwopen-e230147-s003.pdf]

## Data Sharing Statement

Husain. Effect of Adjunctive Simvastatin on Depressive Symptoms Among Adults With Treatment-Resistant Depression. *JAMA Netw Open*. Published February 20, 2023.  
doi:10.1001/jamanetworkopen.2023.0147

### Data

**Data available:** Yes

**Data types:** Deidentified participant data

**How to access data:** [ishrat.husain@camh.ca](mailto:ishrat.husain@camh.ca)

**When available:** With publication

### Supporting Documents

**Document types:** None

### Additional Information

**Who can access the data:** Researchers whose proposed use of the data has been approved.

**Types of analyses:** For a specified purpose.

**Mechanisms of data availability:** After approval of a proposal.
